# Supplementary material for: Evaluation of SARS-CoV-2 ORF7a Deletions from COVID-19-Positive Individuals and Its Impact on Virus Spread in Cell Culture
Source: MDPI journal article supplement (doi:10.3390/v15030801), 2023-03-21
Supplement: s1 [file s1]

**Figure S1** Short Tandem Repeats (STRs) contributors analysis of 16538\_ORF7a $\Delta$ 365 sample

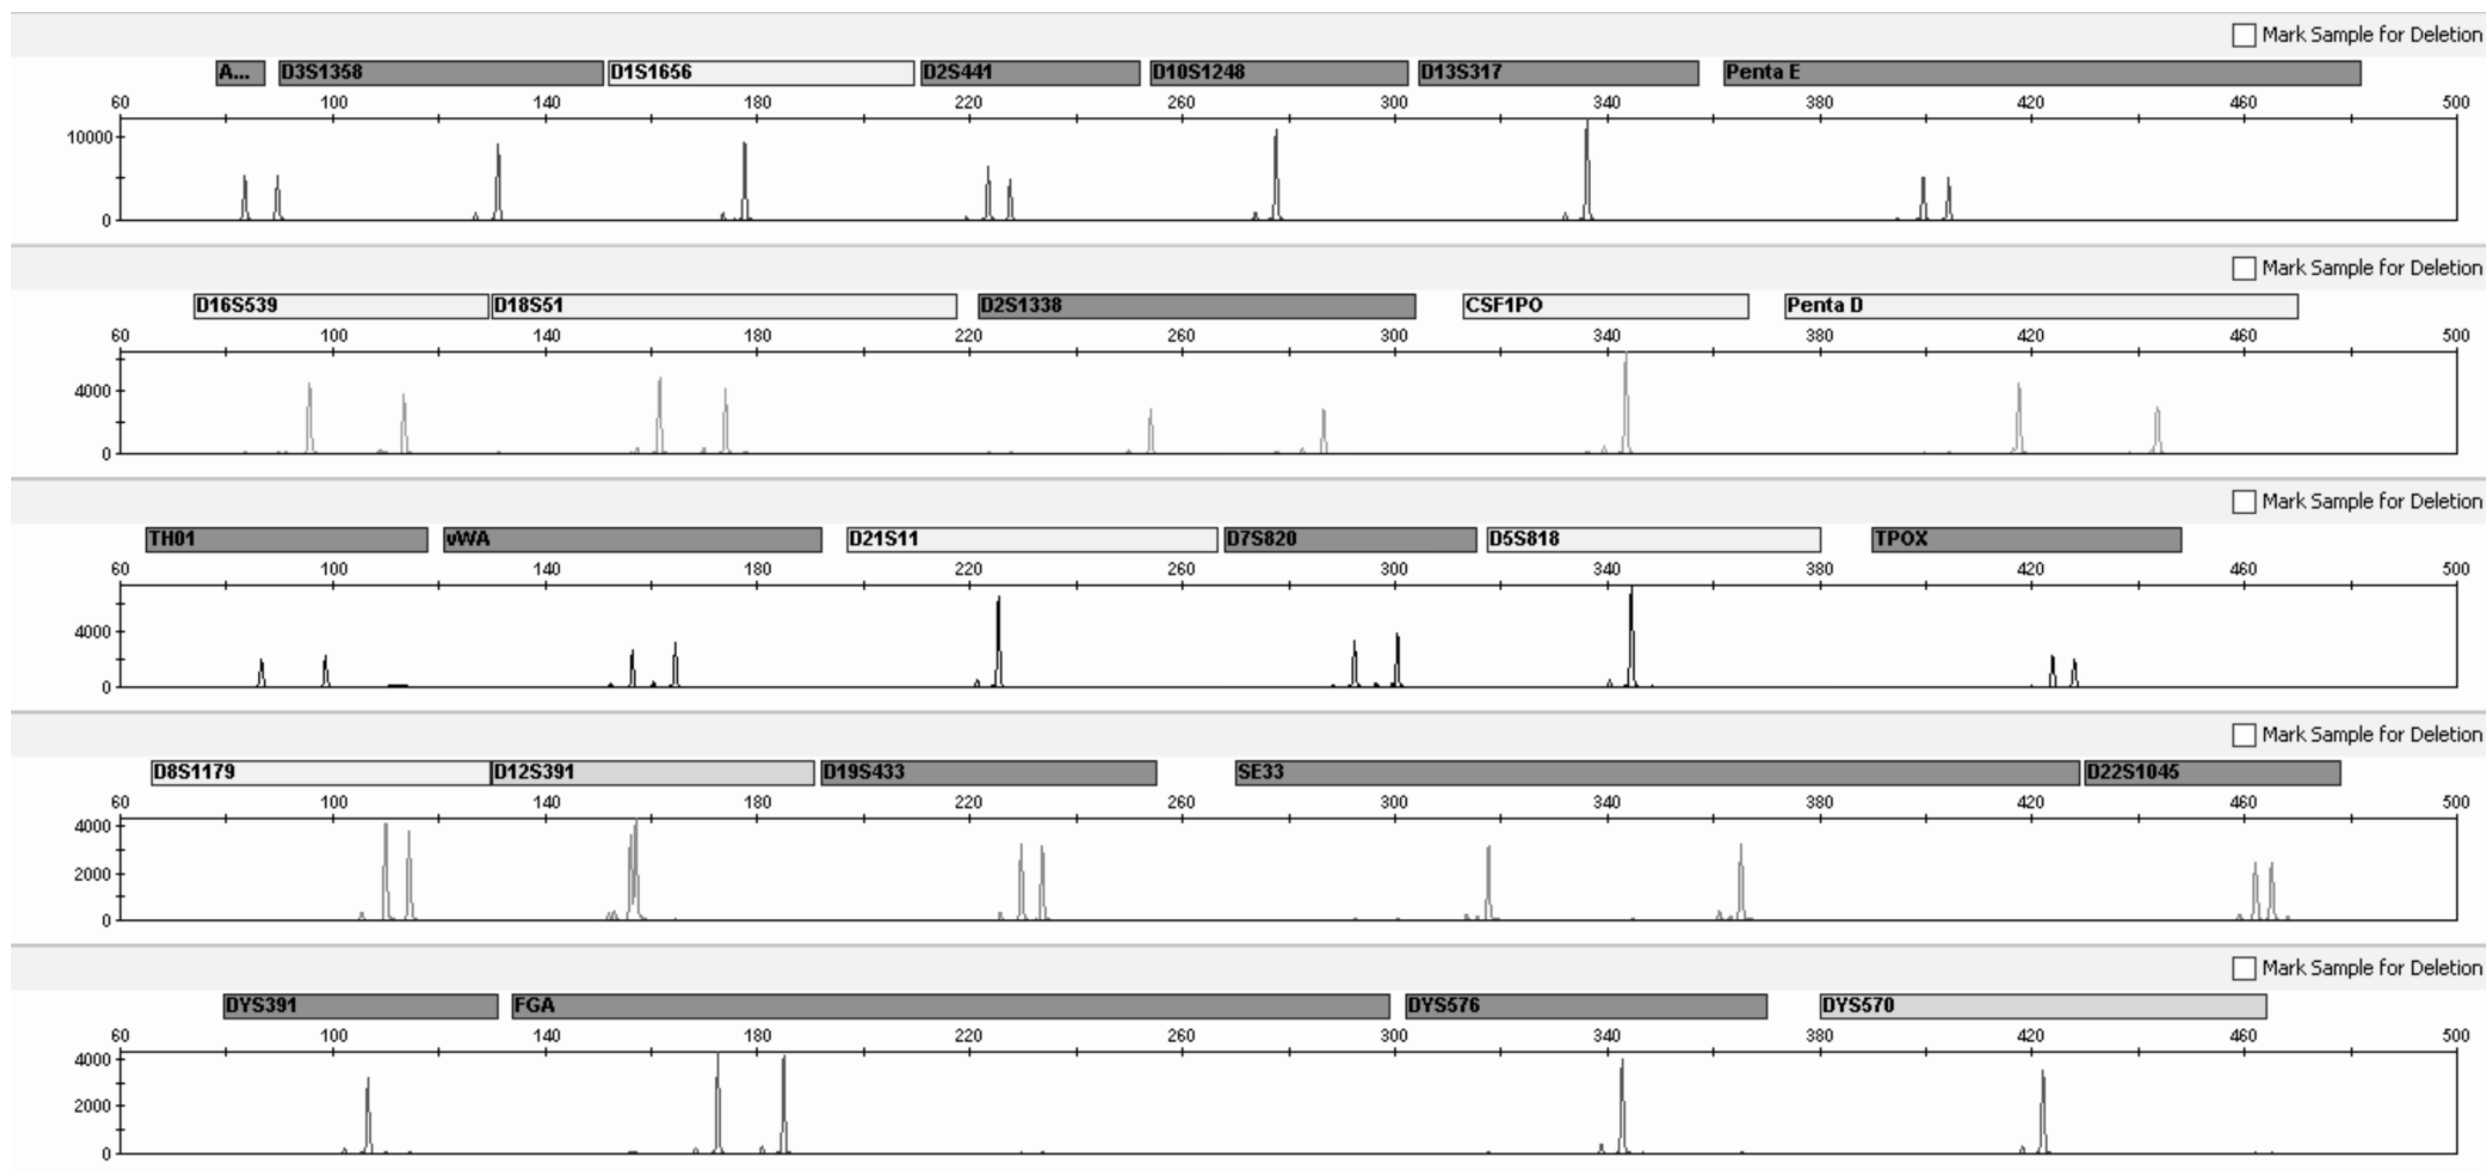

**Figure S2:** Visualization of sgRNAs on 2% agarose gels. **A)** Position of the primers used for cDNA -PCR amplification, forward primer (Leader -18-41) and reverse primers located in ORF7a (27511-27491 and 27531-27512); ORF8 (28003-27986). **B)**Primer pairs, 1, 2 and 3, used for PCR reaction and the corresponding amplification products run in agarose gels staining with ethidium bromide. Clinical samples template are indicated in the top of the gel. Sample 16538\_ORF7a\_Δ365 displays the same profile as the wt-sample (16305\_ORF7a\_wt) due to the presence of the counterpart wt version of the virus. **C)** Amplified sgRNAs from clinical samples using primer pair SARS-Leader 18-41F + N\_28529-28508R and visualized through microfluidic electrophoresis. Clinical samples: 1-11785\_ORF7a\_wt, 2-58301\_ORF7a\_Δ190, 3-16553\_ORF7a\_wt, 4-16991\_ORF7aΔ339, 5- 16538\_ORF7aΔ365 and the counterpart\_wt viruses. The bands indicated by red arrow were excised from agarose gel (E-gel 2%) and Sanger sequenced. Canonical sgRNA are shown in Fig 3. L ladder, Blue arrows: ORF8; Yellow arrows: ORF7a; Orange arrows: N.

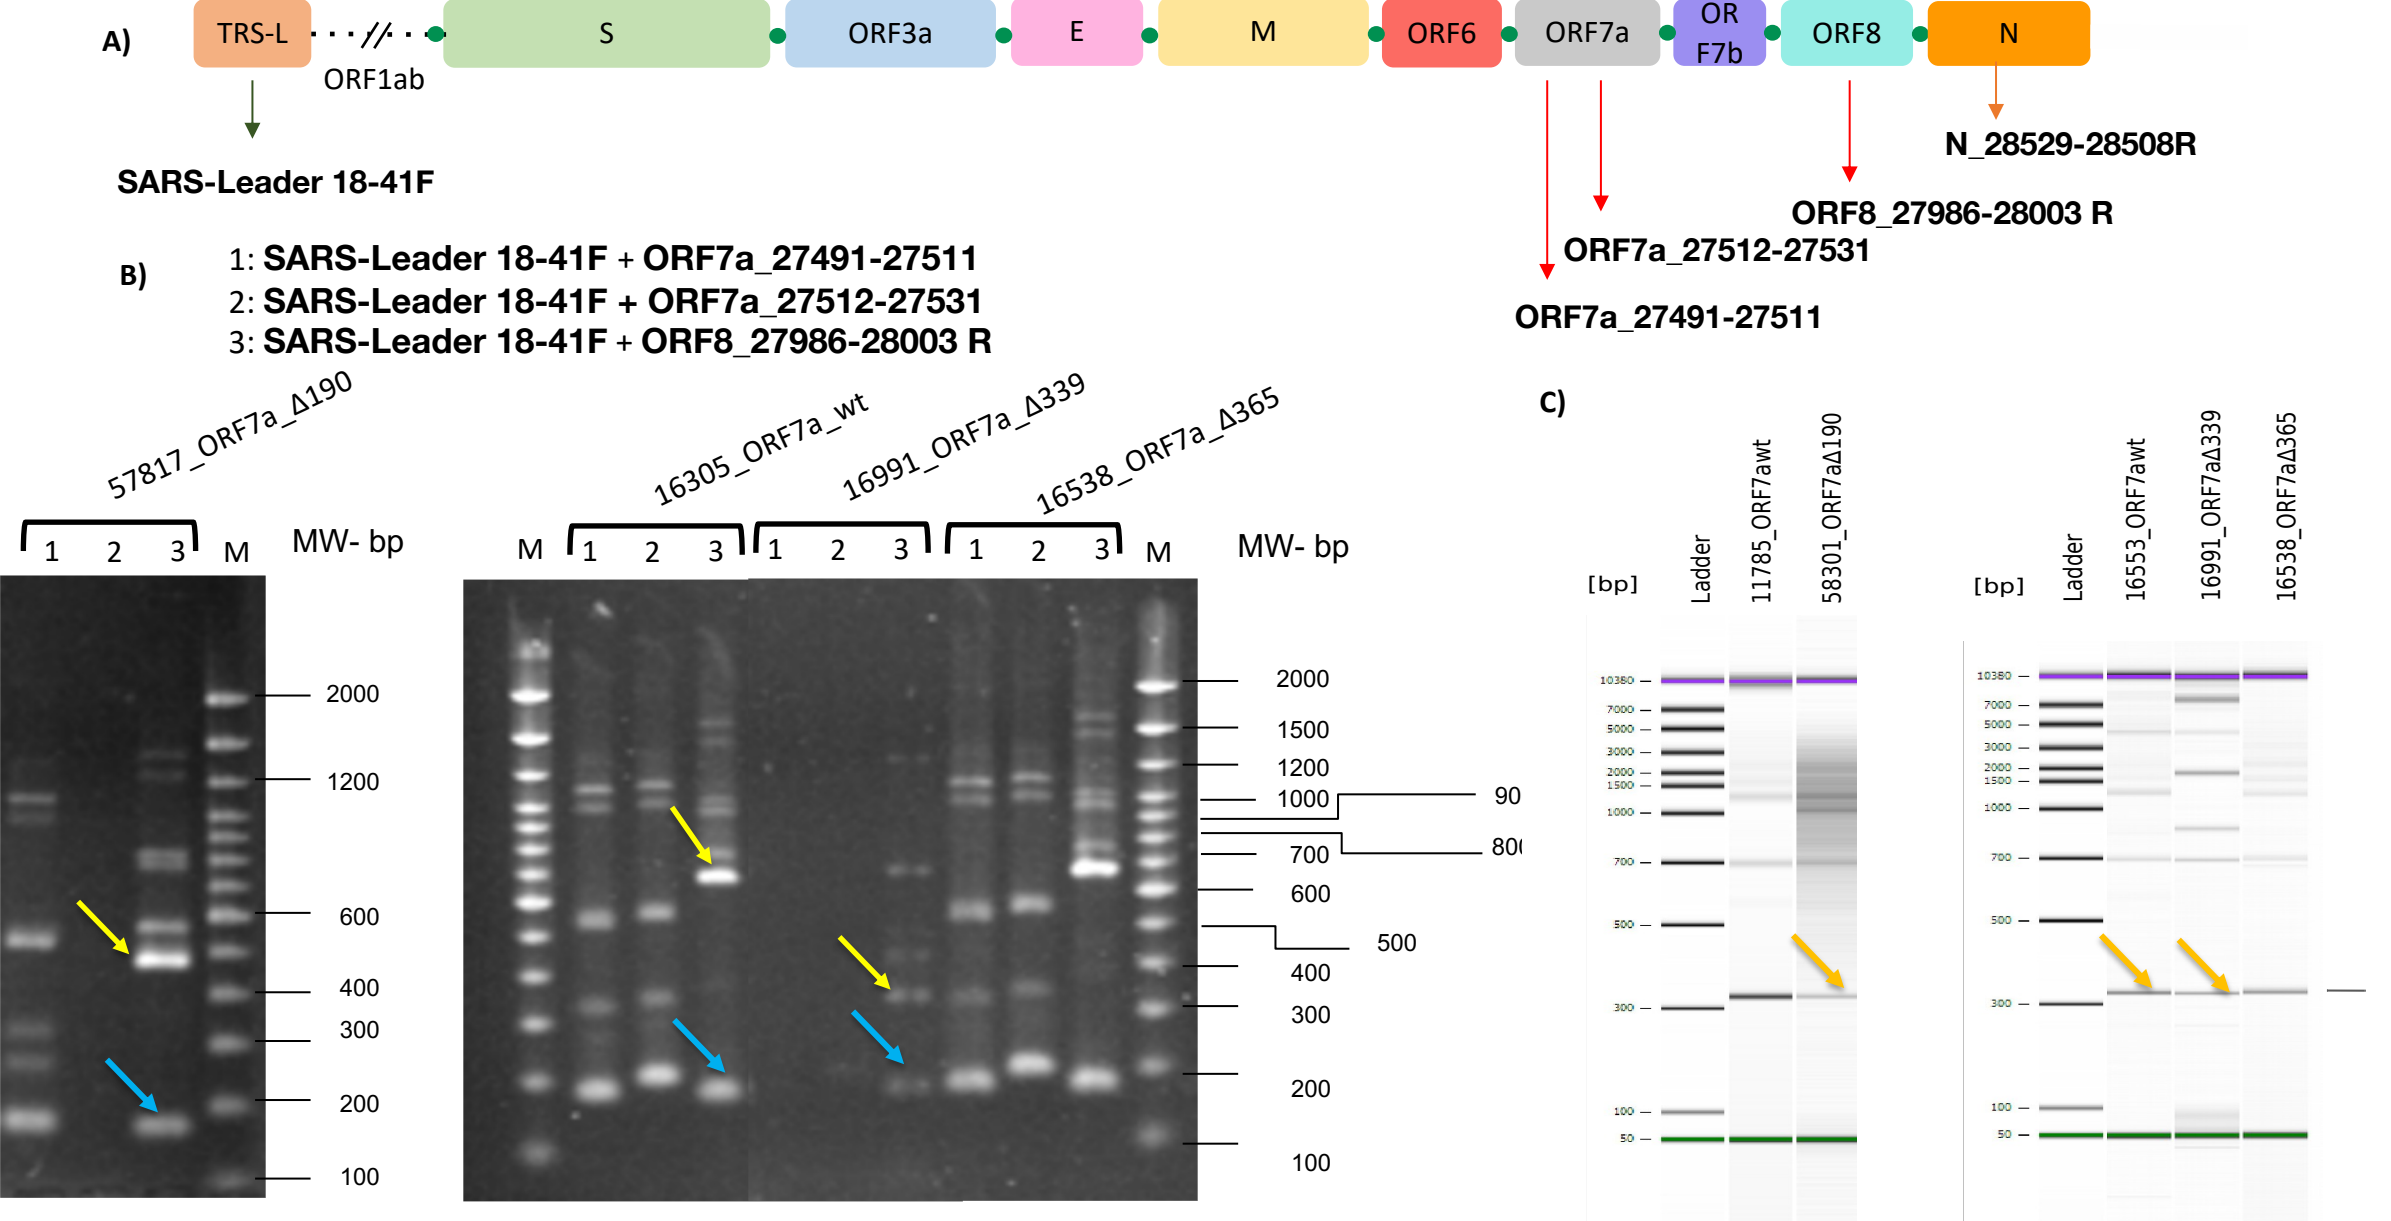

**Figure S3**

A phylogenetic analysis of SARS-CoV-2 samples complete genome sequences, high coverage, available on GISAID, from april to september of 2020, in the State of Rio de Janeiro.

Groups: familial core (blue - bootstrapping 98% of confidence); coworkers (red - bootstrapping of 92% ) and samples from Uruguay (green).

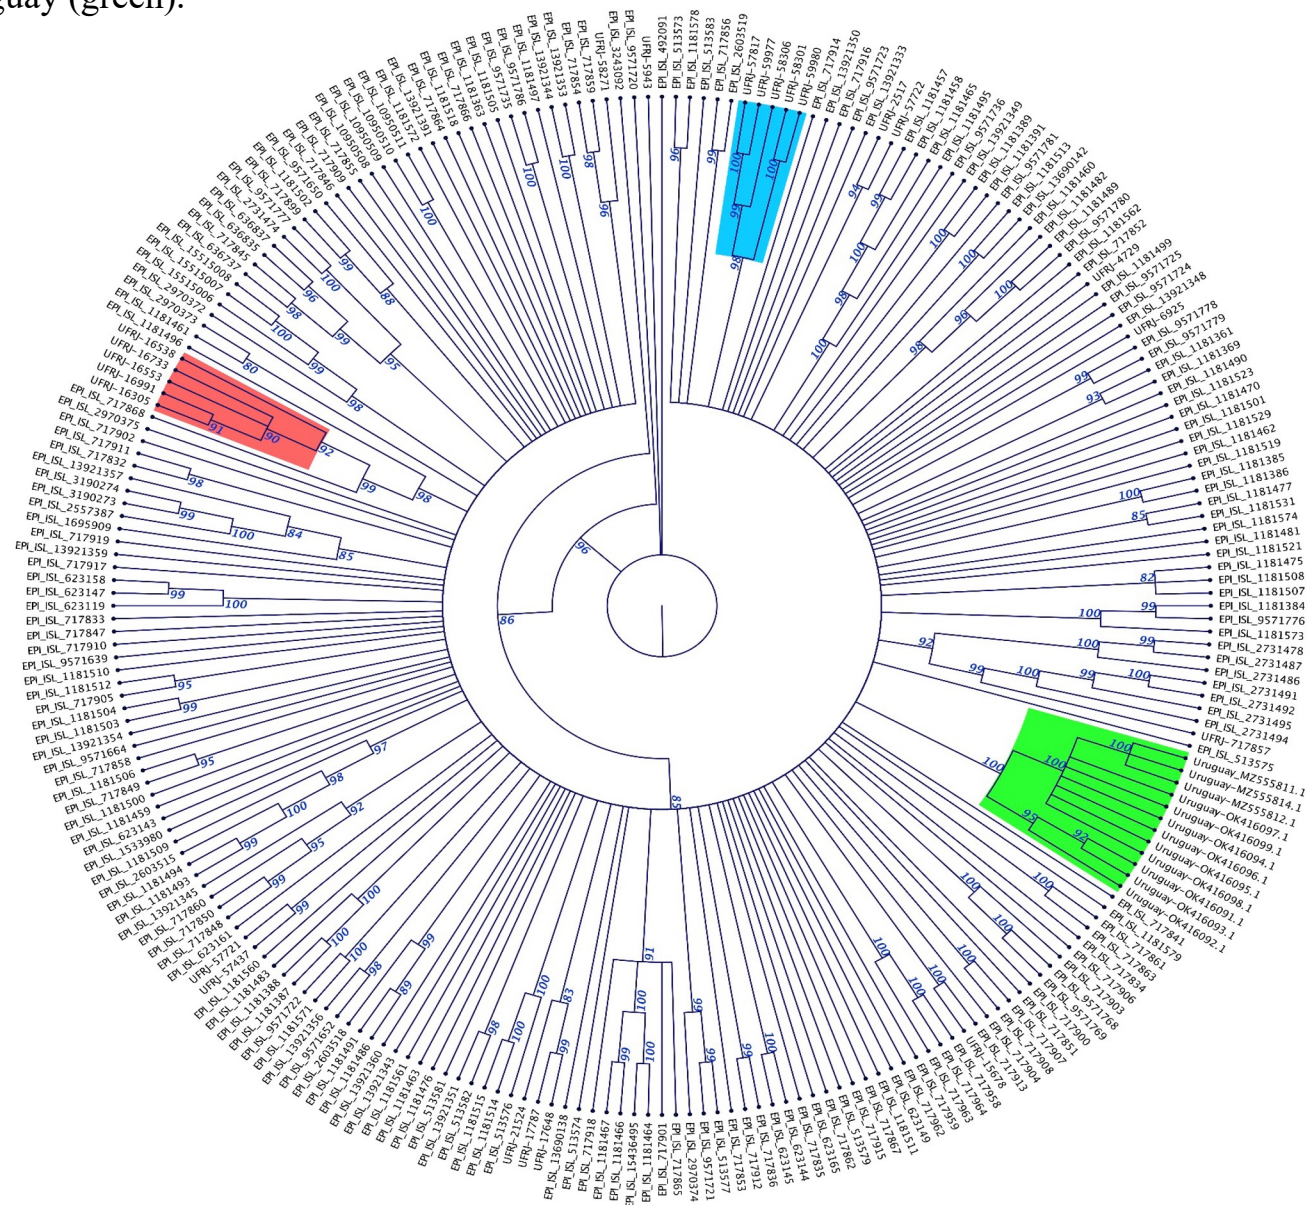

**Table S1** Clinical information of family members with ORF7a\_Δ190 nt

| Sample ID       | GISAID accession ID/NCBI accession ID | Date of birth | Gender | Date of sampling | Ct    | Age (years) | Relationship | Information gathered on sampling date                                 |
|-----------------|---------------------------------------|---------------|--------|------------------|-------|-------------|--------------|-----------------------------------------------------------------------|
| 57817_ORF7aΔ190 | EPI_ISL_16093 686/ OQ430703).         | 01/22/1976    | male   | 05/27/2020       | 21,22 | 44          | father       | Mild symptoms: head and bodyache and fever; no hospitalization needed |
| 58301_ORF7aΔ190 | EPI_ISL_16093 682/ OQ430699           | 4/5/2011      | female | 06/01/2020       | 13,8  | 9           | Daughter     | Mild symptoms: head and bodyache and fever; no hospitalization needed |
| 58306_ORF7aΔ190 | EPI_ISL_16093 685/ OQ430702           | 08/19/1977    | female | 06/01/2020       | 20,18 | 43          | mother       | Mild symptoms: headache and runny nose, no hospitalization needed     |
| 59977_ORF7aΔ190 | EPI_ISL_16093 683/ OQ430700           | 09/30/2011    | female | 06/09/2020       | 18,98 | 8           | niece        | Mild symptoms: cough and runny nose; no hospitalization needed        |
| 59980_ORF7aΔ190 | EPI_ISL_16093 684/ OQ430701           | 02/20/2013    | male   | 06/09/2020       | 24,54 | 7           | son          | Mild symptoms: cough and runny nose; no hospitalization needed        |

**Table S2** Nucleotide mutations and amino acid substitutions in genomes of SARS-CoV-2 with ORF7a\_Δ190 nt

| Sample      | Nucleotide Substitutions |        |        |         |         |         |         |         |         |         |         | Amino Acid Substitutions |                  |                 |           |        |         |         |         |         |
|-------------|--------------------------|--------|--------|---------|---------|---------|---------|---------|---------|---------|---------|--------------------------|------------------|-----------------|-----------|--------|---------|---------|---------|---------|
| 59977 Δ 190 | C4014T                   |        | C4543T | C14408T | C21855T | A23403G | T27299C | G28881A | G28882A | G28883C | T29148C | ORF1a:T125<br>OI         |                  | ORF1b:P314<br>L | ORF6:I33T | S:S98F | S:D614G | N:R203K | N:G204R | N:I292T |
| 59980 Δ 190 | C4014T                   |        | C4543T | C14408T | C21855T | A23403G | T27299C | G28881A | G28882A | G28883C | T29148C | ORF1a:T125<br>OI         |                  | ORF1b:P314<br>L | ORF6:I33T | S:S98F | S:D614G | N:R203K | N:G204R | N:I292T |
| 58306 Δ 190 | C4014T                   |        | C4543T | C14408T | C21855T | A23403G | T27299C | G28881A | G28882A | G28883C | T29148C | ORF1a:T125<br>OI         |                  | ORF1b:P314<br>L | ORF6:I33T | S:S98F | S:D614G | N:R203K | N:G204R | N:I292T |
| 57817 Δ 190 | C4014T                   | T4118C | C4543T | C14408T | C21855T | A23403G | T27299C | G28881A | G28882A | G28883C | T29148C | ORF1a:T125<br>OI         | ORF1a:Y128<br>5H | ORF1b:P314<br>L | ORF6:I33T | S:S98F | S:D614G | N:R203K | N:G204R | N:I292T |
| 58301 Δ 190 | C4014T                   |        | C4543T | C14408T | C21855T | A23403G | T27299C | G28881A | G28882A | G28883C | T29148C | ORF1a:T125<br>OI         |                  | ORF1b:P314<br>L | ORF6:I33T | S:S98F | S:D614G | N:R203K | N:G204R | N:I292T |
|             | ORF 1ab                  |        |        |         | S       |         | ORF6    | N       |         |         |         | ORF1ab                   |                  |                 | ORF6      | S      |         | N       |         |         |

**Table S3** Clinical information of coworkers with ORF7a\_Δ339 and ORF7a\_Δ365 deletion and ORF7a\_wt

| Sample ID           | GISAID<br>accession<br>ID/NCBI<br>accession ID | Gender  | Date of<br>sampling | Ct    |       | Relationship | Information gathered on sampling<br>date    |
|---------------------|------------------------------------------------|---------|---------------------|-------|-------|--------------|---------------------------------------------|
|                     |                                                |         |                     | N2    | RP    |              |                                             |
| 16538_ORF7aΔ<br>365 | EPI_ISL_159775<br>91/ OQ430693                 | male    | 7/29/2020           |       | 25.36 | Coworkers    | Mild symptoms, no hospitalization<br>needed |
| 16553_ORF7a_<br>wt  | EPI_ISL_160936<br>80                           | male    | 7/29/2020           |       | 20.57 | Coworkers    | Mild symptoms, no hospitalization<br>needed |
| 16991_ORF7aΔ<br>339 | EPI_ISL_159775<br>92/ OQ430694)                | male    | 8/4/2020            | 29.09 |       | Coworkers    | Mild symptoms, no hospitalization<br>needed |
| 16305_ORF7a_<br>wt  | EPI_ISL_159775<br>90/ OQ430692                 | unknown | 7/27/2020           | 17.48 |       | Coworkers    | Mild symptoms, no hospitalization<br>needed |

**Table S4** Nucleotide mutations and amino acid substitutions in genomes of SARS-CoV-2 with ORF7a\_Δ339 and ORF7a\_Δ365 deletion and ORF7a\_wt

| Sample           | Nucleotide Substitutions |        |        |         |         |         |         |         |         |         |         |         |         |         |         | Amino Acid substitutions |       |       |       |       |      |       |       |       |  |
|------------------|--------------------------|--------|--------|---------|---------|---------|---------|---------|---------|---------|---------|---------|---------|---------|---------|--------------------------|-------|-------|-------|-------|------|-------|-------|-------|--|
| 16553_wt         | C241T                    | C3037T | C4099T | A12082T | C14408T | G22014A | T22015G | G22017T | A23403G | A24292G | T27299C | G28881A | G28882A | G28883C | T29148C | K1202Q                   | P314L | S151K | W152L | D614G | I33T | R203K | G204R | I292T |  |
| 16305_wt         | C241T                    | C3037T | C4099T | A12082T | C14408T |         |         |         | A23403G | A24292G | T27299C | G28881A | G28882A | G28883C | T29148C |                          | P314L |       |       | D614G | I33T | R203K | G204R | I292T |  |
| 16538 Δ 365 & wt | C241T                    | C3037T | C4099T | A12082T | C14408T |         |         |         | A23403G | A24292G | T27299C | G28881A | G28882A | G28883C | T29148C |                          | P314L |       |       | D614G | I33T | R203K | G204R | I292T |  |
| 16991 Δ 399      | C241T                    | C3037T | C4099T | A12082T | C14408T |         |         |         | A23403G | A24292G | T27299C | G28881A | G28882A | G28883C | T29148C |                          | P314L |       |       | D614G | I33T | R203K | G204R | I292T |  |
|                  | ORF1ab                   |        |        |         |         | S       |         |         |         |         | ORF6    | N       |         |         |         | ORF1ab                   | S     |       |       | ORF6  | N    |       |       |       |  |

**Table S5**

Plaque purify 16538 ORF7a\_Δ365 and 16538 ORF7a\_wt stock viruses grown in different cell cultures.

| Sample | Virus type       | qPCR (C <sub>T</sub> ) | Cell type         | Passage |
|--------|------------------|------------------------|-------------------|---------|
| P2     | 16538 ORF7a_wt   | 22.00                  | Vero E6           | 2       |
| P4     | 16538 ORF7a_wt   | 22.35                  |                   |         |
| P5     | 16538 ORF7a_Δ365 | 23.19                  |                   |         |
| P6     | 16538 ORF7a_Δ365 | 21.96                  |                   |         |
| P2     | 16538 ORF7a_wt   | 28.58                  | Vero ACE2 TMPRSS2 | 3       |
| P4     | 16538 ORF7a_wt   | 28.27                  |                   |         |
| P5     | 16538 ORF7a_Δ365 | 30.38                  |                   |         |
| P6     | 16538 ORF7a_Δ365 | 28.28                  |                   |         |
| P2     | 16538 ORF7a_wt   | und                    | Calu-3            | 3       |
| P4     | 16538 ORF7a_wt   | 25.25                  |                   |         |
| P5     | 16538 ORF7a_Δ365 | 24.65                  |                   |         |
| P6     | 16538 ORF7a_Δ365 | 24.37                  |                   |         |
